# Supplementary material for: Immunologic Assessment of Tumors from a Race-matched Military Cohort Identifies Mast Cell Depletion as a Marker of Prostate Cancer Progression
Source: PubMed Central journal article supplement (PMC10392708; doi:10.1158/2767-9764.crc-22-0463), 2023-08-01
Supplement: crc-22-0463-s07.pdf [file crc-22-0463-s07.pdf]

# Supplementary Figure S7

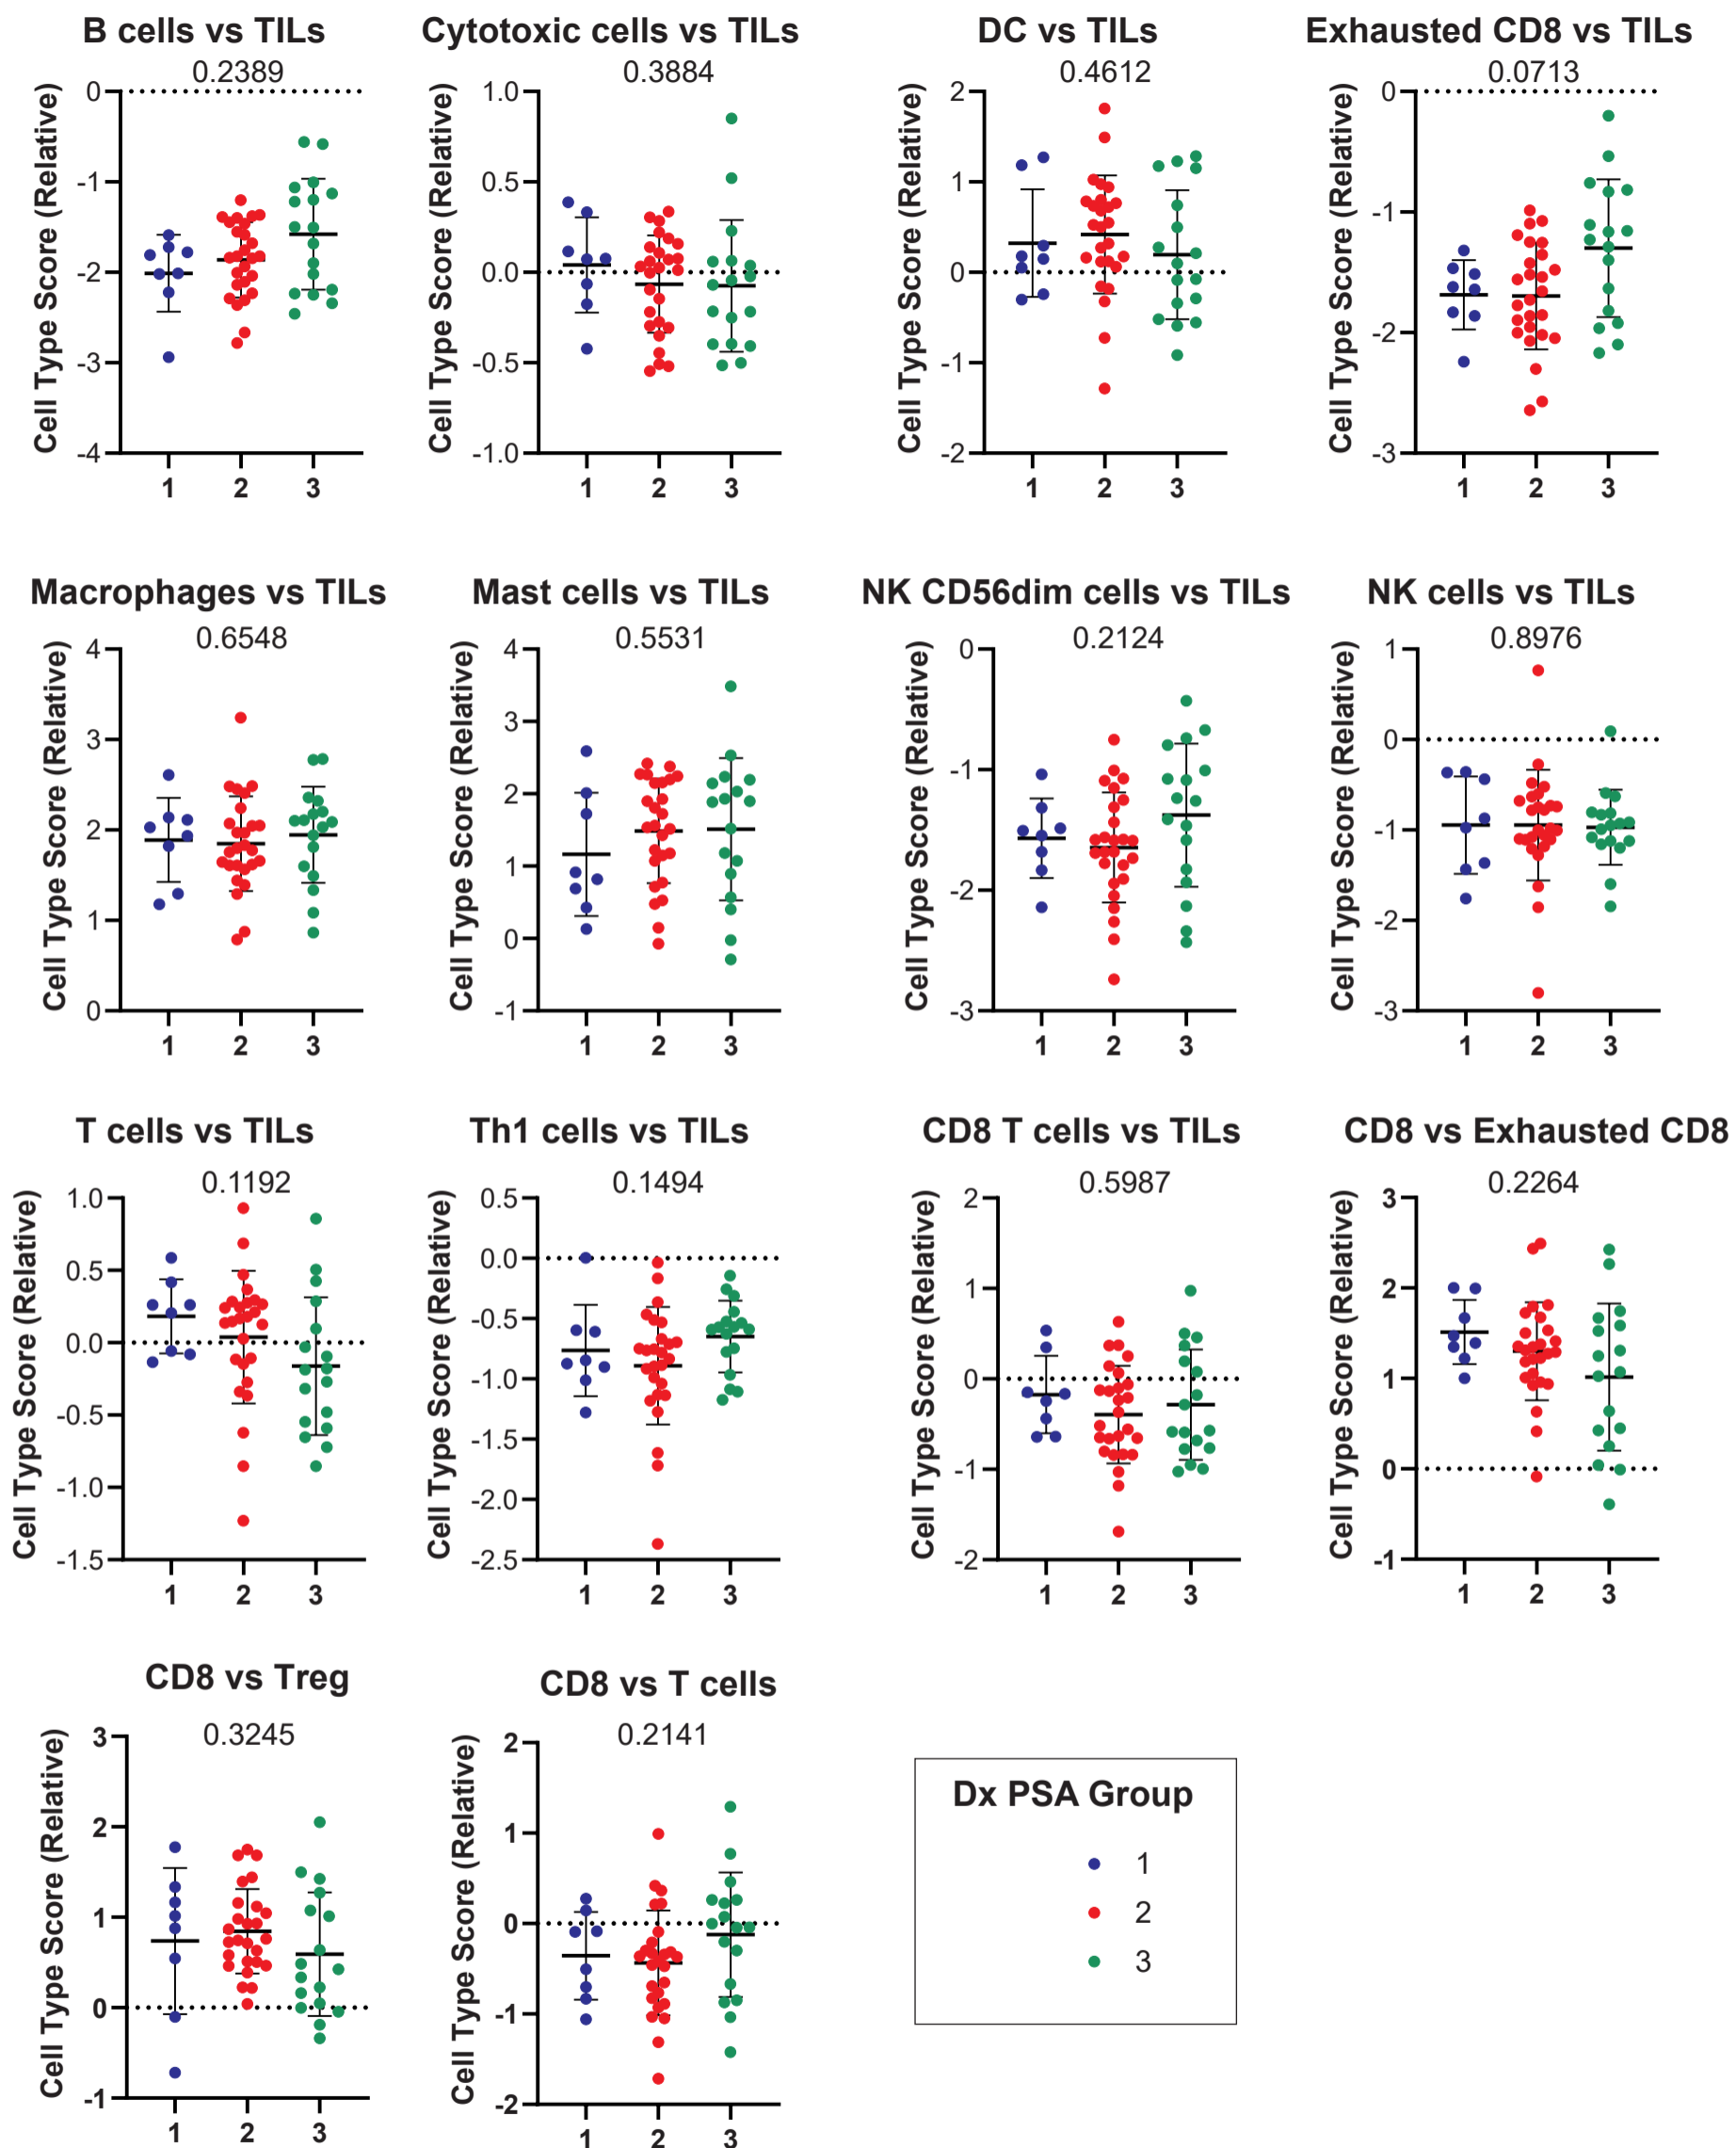

**Supplementary Figure S7.** Additional relative cell type contrasts compared by Dx PSA Group. Individual relative cell type scores are plotted for Dx PSA Groups and are evaluated by Kruskal-Wallis test followed by Dunn's multiple comparisons post-test. Each dot represents a patient score, and error bars correspond to mean  $\pm$  SD.
