# Supplementary material for: Immunologic Assessment of Tumors from a Race-matched Military Cohort Identifies Mast Cell Depletion as a Marker of Prostate Cancer Progression
Source: PubMed Central journal article supplement (PMC10392708; doi:10.1158/2767-9764.crc-22-0463), 2023-08-01
Supplement: crc-22-0463-s09.pdf [file crc-22-0463-s09.pdf]

# Supplementary Figure S9

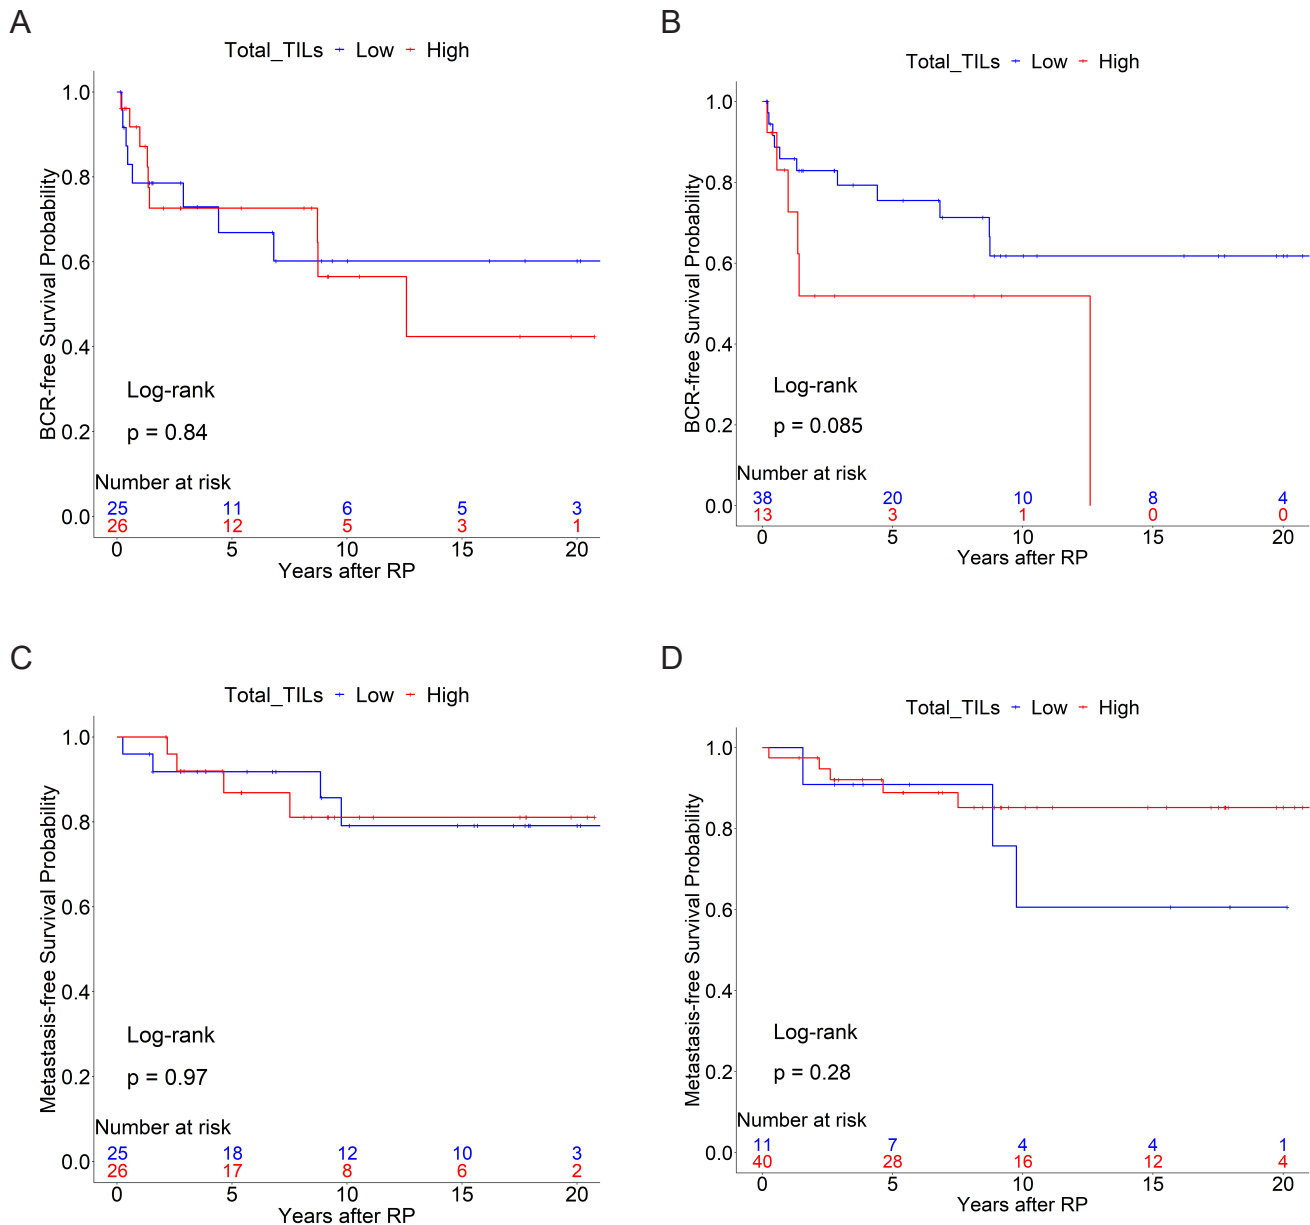

**Supplementary Figure S9.** BCR-free and metastasis-free survival differences in high vs low Total TILs scores. Kaplan Meier product-limit survival curves plotted for (A-B) BCR-free and (C-D) metastasis-free survival at log-rank  $p > 0.05$  for high vs low Total TILs score cutoffs by (A and C) median and (B and D) Youden index.
