# Supplementary material for: Immunologic Assessment of Tumors from a Race-matched Military Cohort Identifies Mast Cell Depletion as a Marker of Prostate Cancer Progression
Source: PubMed Central journal article supplement (PMC10392708; doi:10.1158/2767-9764.crc-22-0463), 2023-08-01
Supplement: crc-22-0463-s10.pdf [file crc-22-0463-s10.pdf]

# Supplementary Figure S10

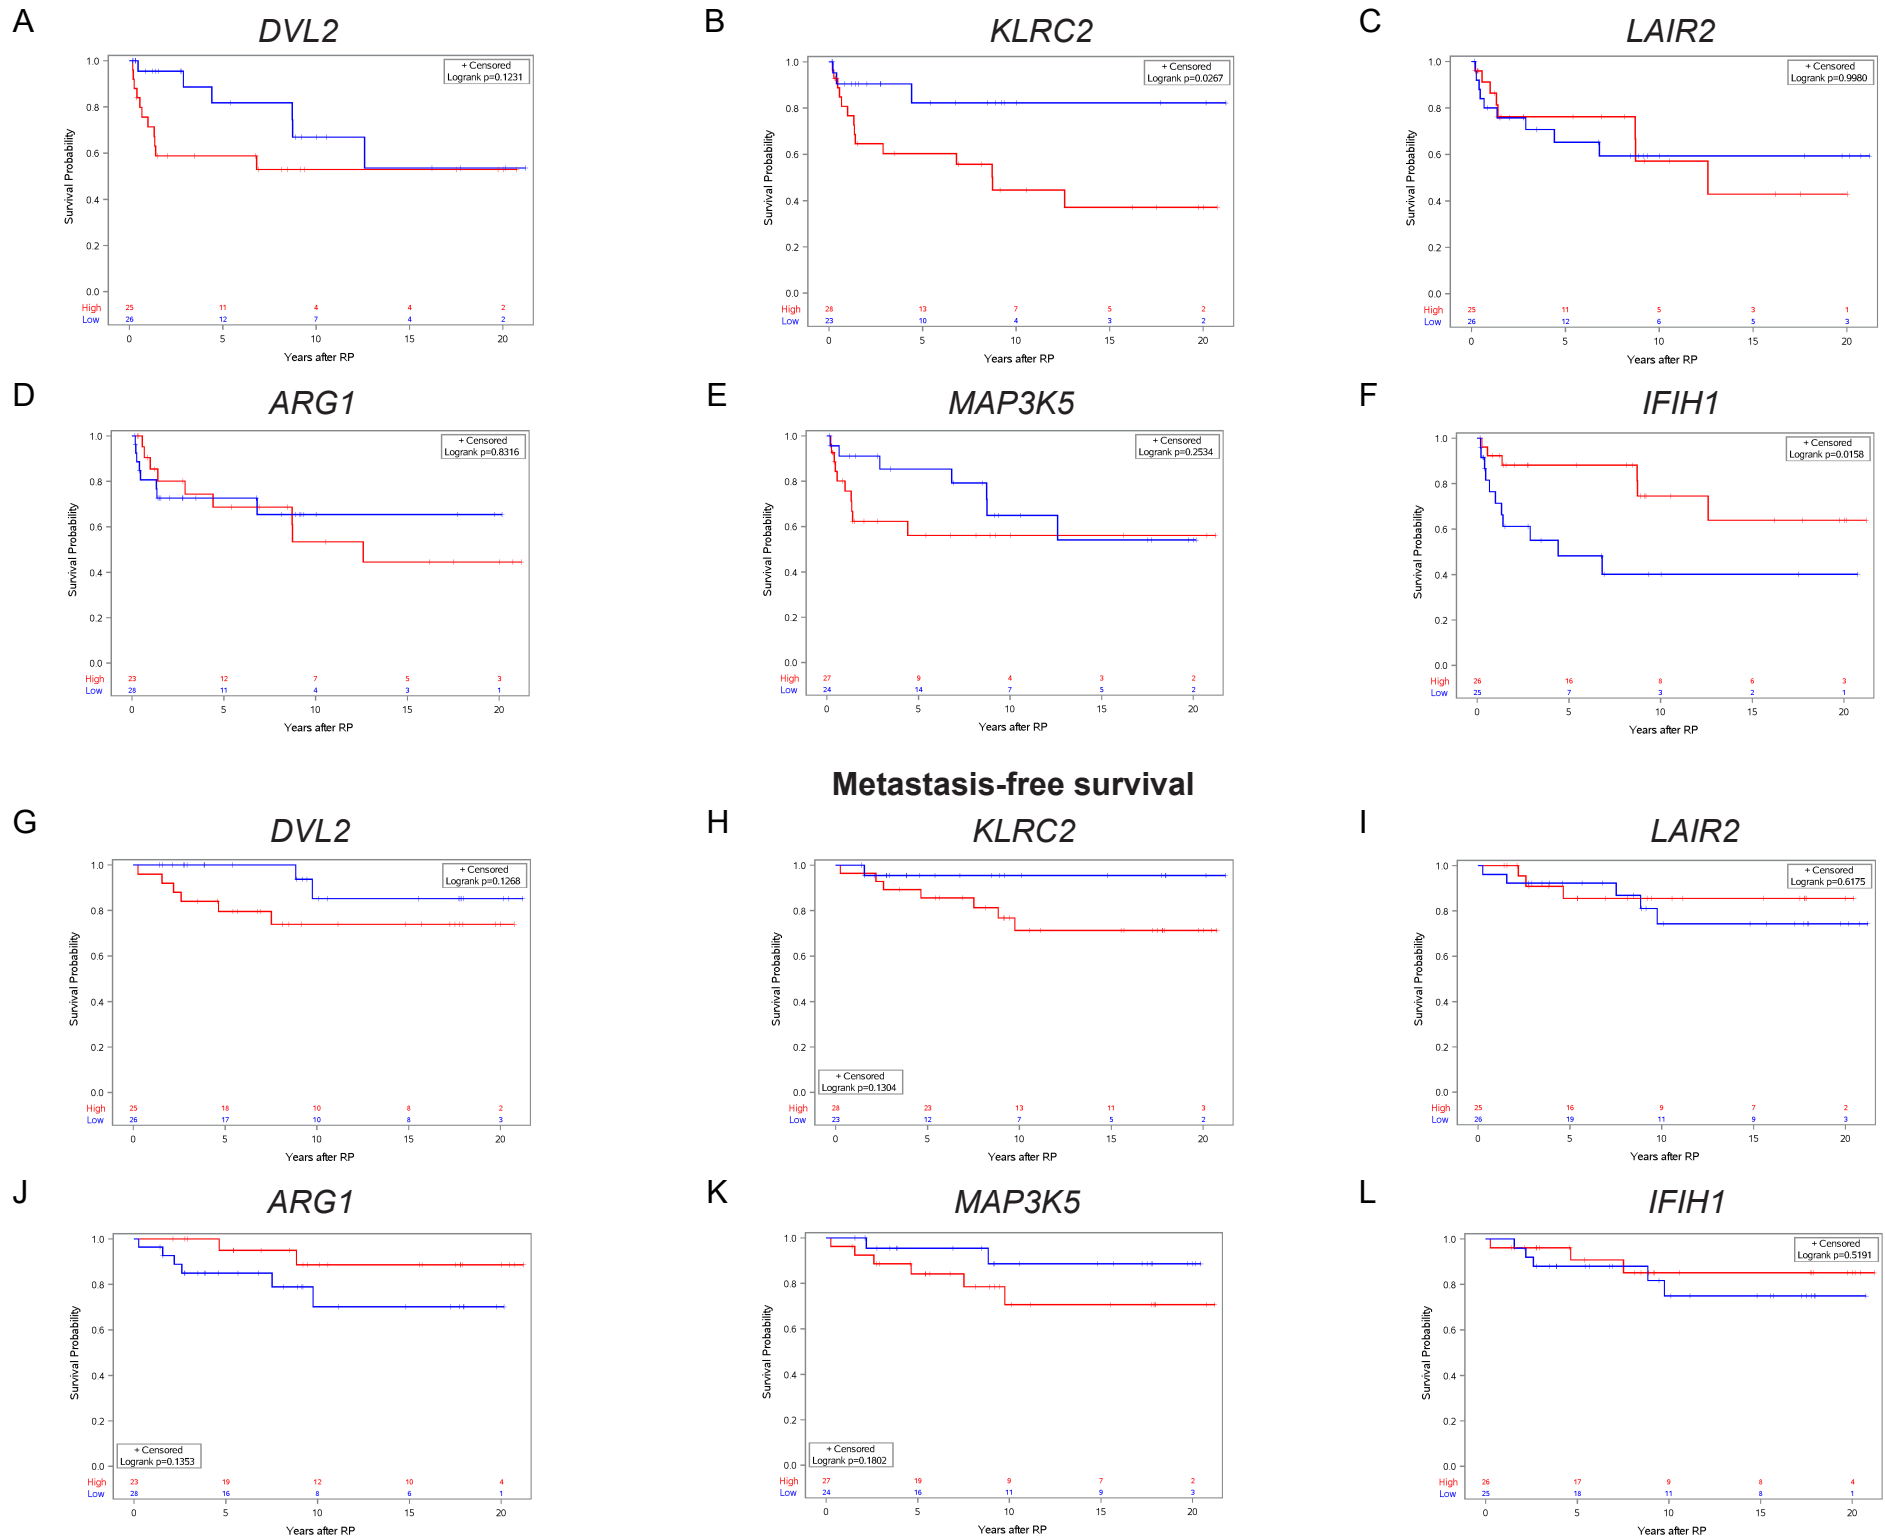

**Supplementary Figure S10.** Log-rank survival estimates, for (A-F) BCR-free and (G-L) metastasis-free survival, of the top six differentially expressed genes plotted by median cutoffs for high vs low gene expression. The full list of p-values for median, continuous, and Youden index analyses are shown in Supplementary Table S2.
