# Supplementary material for: Immunologic Assessment of Tumors from a Race-matched Military Cohort Identifies Mast Cell Depletion as a Marker of Prostate Cancer Progression
Source: PubMed Central journal article supplement (PMC10392708; doi:10.1158/2767-9764.crc-22-0463), 2023-08-01
Supplement: crc-22-0463-s11.pdf [file crc-22-0463-s11.pdf]

# Supplementary Figure S11

— High — Low

## BCR-free survival

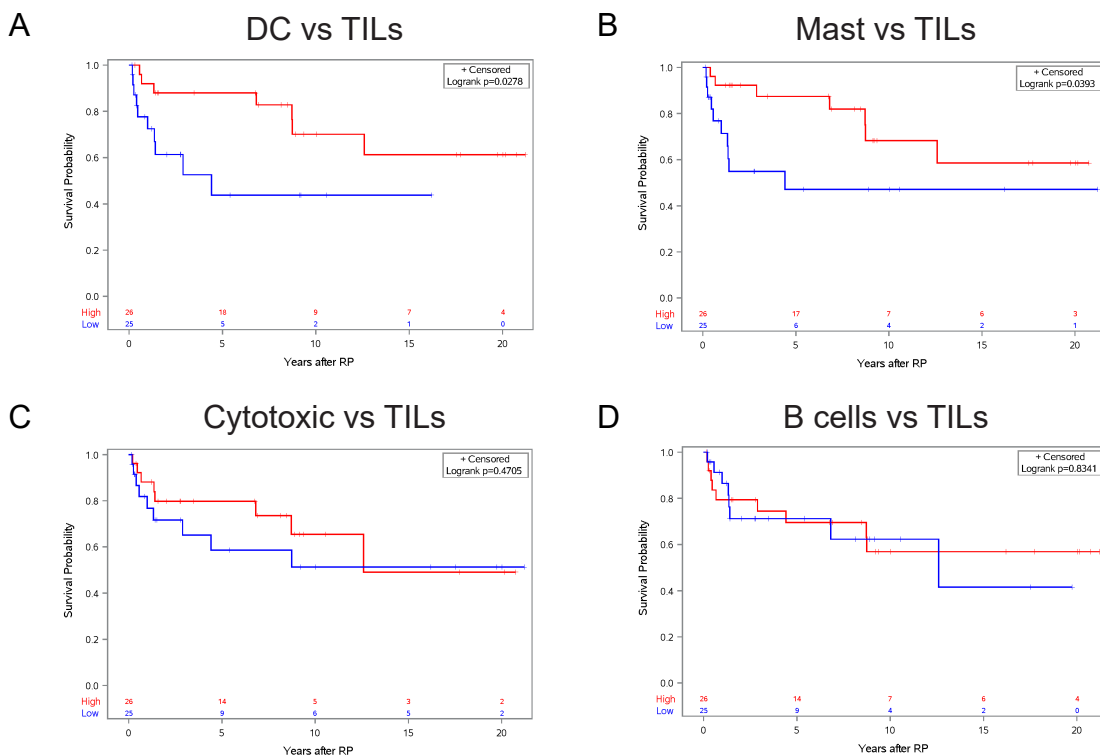

## Metastasis-free survival

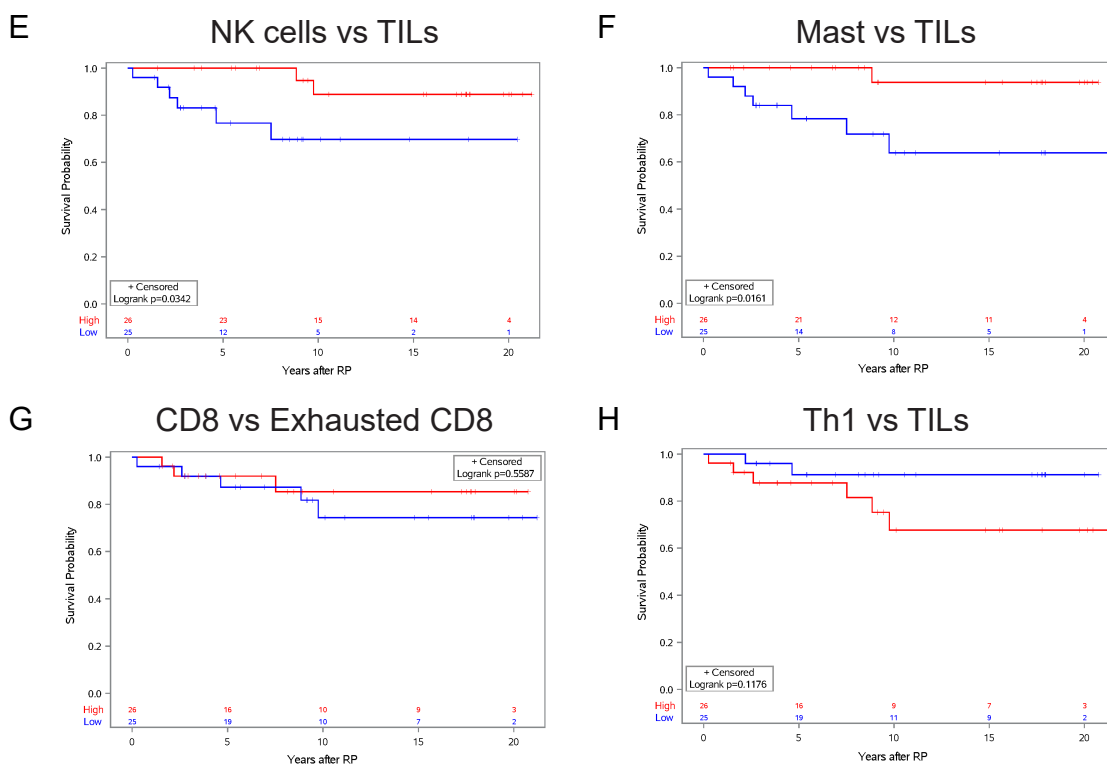

**Supplementary Figure S11.** Log-rank survival estimates, for (A-D) BCR-free and (E-H) metastasis-free survival, for cell types plotted by median cutoffs. The full list of p-values for median, continuous, and Youden index analyses are shown in Supplementary Table S3.
