# Supplementary material for: Immunologic Assessment of Tumors from a Race-matched Military Cohort Identifies Mast Cell Depletion as a Marker of Prostate Cancer Progression
Source: PubMed Central journal article supplement (PMC10392708; doi:10.1158/2767-9764.crc-22-0463), 2023-08-01
Supplement: crc-22-0463-s12.pdf [file crc-22-0463-s12.pdf]

# Supplementary Figure S12

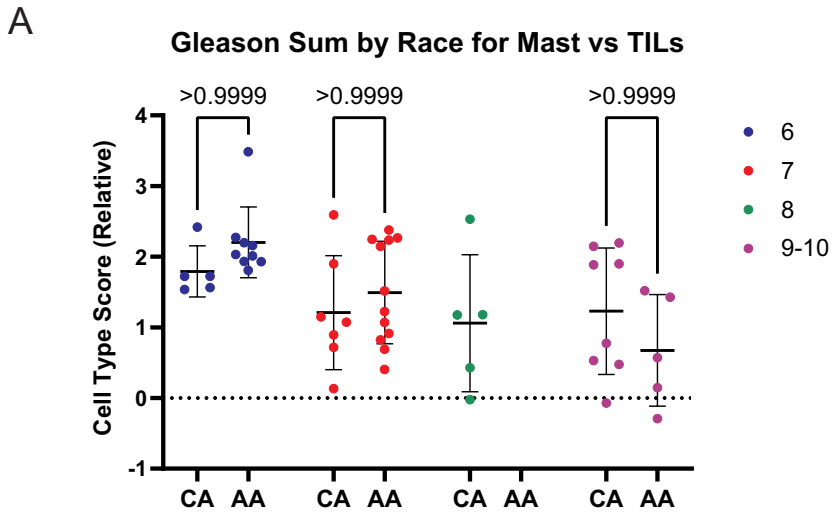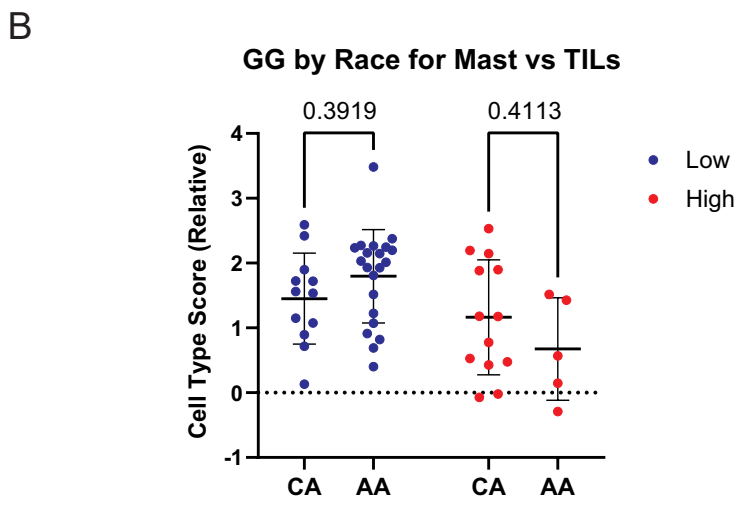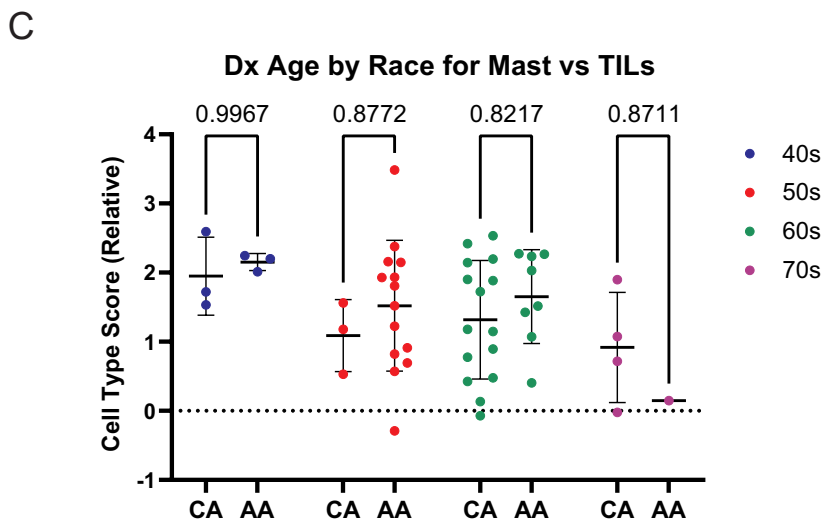

**Supplementary Figure S12.** Mast vs TILs scores stratified by race for (A) Gleason Sum, (B) GG, and (C) Dx Age. Error bars represent mean  $\pm$  SD. 2-way ANOVA and Sidak's multiple comparisons test is used to compare groups with corresponding adjusted p-values.
